# Supplementary material
Source: publisher figshare collection journal article supplement (https://rs.figshare.com/ndownloader/files/14132036)
Supplement: Supplementary file 1 [file 14132036]

## Sheet: Sheet1
Table S10. Presence of Blattabacterium in Blattodea transcriptomes. “1” indicates presence of the endosymbiont; “0” indicates their absence. s.s: sensu stricto
Order	Group 1	Group 2	Genus	Presence of Blattabacterium
Blattodea	Blaberoidea	Blaberidae	Blaberus	1
Blattodea	Blaberoidea	Blaberidae	Diploptera	0
Blattodea	Blaberoidea	Blaberidae	Gyna	1
Blattodea	Blaberoidea	Blaberidae	Nauphoeta	1
Blattodea	Blaberoidea	Blaberidae	Panchlora	1
Blattodea	Blaberoidea	Blaberidae	Princisia	1
Blattodea	Blaberoidea	Blaberidae	Schultesia	1
Blattodea	Blaberoidea	Blattellinae	Asiablatta	1
Blattodea	Blaberoidea	Blattellinae	Blattella	1
Blattodea	Blaberoidea	Blattellinae	Episymploce	1
Blattodea	Blaberoidea	Blattellinae	Ischnoptera	1
Blattodea	Blaberoidea	Blattellinae	Loboptera	1
Blattodea	Blaberoidea	Blattellinae	Lobopterella	1
Blattodea	Blaberoidea	Blattellinae	Paratemnopteryx	1
Blattodea	Blaberoidea	Blattellinae	Symploce	1
Blattodea	Blaberoidea	Nyctiborinae	Nyctibora	1
Blattodea	Blaberoidea	Pseudophyllodromiinae	Anallacta	1
Blattodea	Blaberoidea	Pseudophyllodromiinae	Balta	1
Blattodea	Blaberoidea	Pseudophyllodromiinae	Cariblatta	1
Blattodea	Blaberoidea	Pseudophyllodromiinae	Ellipsidion	1
Blattodea	Blaberoidea	Pseudophyllodromiinae	Euthlastoblatta	1
Blattodea	Blaberoidea	Pseudophyllodromiinae	Sundablatta	1
Blattodea	Blaberoidea	Pseudophyllodromiinae	Supella	1
Blattodea	Blaberoidea	Ectobiinae	Ectobius	1
Blattodea	Solumblattodea	Corydiidae s.s.	Ergaula	1
Blattodea	Solumblattodea	Corydiidae s.s.	Eucorydia	1
Blattodea	Solumblattodea	Corydiidae s.s.	Polyphaga	1
Blattodea	Solumblattodea	Corydiidae s.s.	Therea	1
Blattodea	Solumblattodea	Corydiidae s.s.	Tivia	0
Blattodea	Solumblattodea	Nocticolinae	Nocticola	0
Blattodea	Solumblattodea	Tryonicidae	Tryonicus	1
Blattodea	Solumblattodea	Blattidae	Catara	1
Blattodea	Solumblattodea	Blattidae	Deropeltis	1
Blattodea	Solumblattodea	Blattidae	Methana	1
Blattodea	Solumblattodea	Blattidae	Periplaneta	1
Blattodea	Solumblattodea	Blattidae	Shelfordella	1
Blattodea	Solumblattodea	Blattidae	Eurycotis	1
Blattodea	Solumblattodea	Lamproblattidae	Lamproblatta	0
Blattodea	Solumblattodea	Cryptocercidae	Cryptocercus	1
Blattodea	Solumblattodea	Isoptera	Coptotermes	0
Blattodea	Solumblattodea	Isoptera	Incisitermes	0
Blattodea	Solumblattodea	Isoptera	Mastotermes	1
Blattodea	Solumblattodea	Isoptera	Prorhinotermes	0
Blattodea	Solumblattodea	Isoptera	Reticulitermes	0
Mantodea	Outgroup	Mantodea	Mantoida	0
Mantodea	Outgroup	Mantodea	Metallyticus	0
Embioptera	Outgroup	Outgroup	Antipaluria	0
Phasmatodea	Outgroup	Outgroup	Antongilia	0
Orthoptera	Outgroup	Outgroup	Aularches	0
Plecoptera	Outgroup	Outgroup	Cosmioperla	0
Dermaptera	Outgroup	Outgroup	Diplatys	0
Dermaptera	Outgroup	Outgroup	Forficula	0
Grylloblattodea	Outgroup	Outgroup	Galloisiana	0
Grylloblattodea	Outgroup	Outgroup	Grylloblatta	0
Embioptera	Outgroup	Outgroup	Haploembia	0
Mantophasmatodea	Outgroup	Outgroup	Mantophasma	0
Orthoptera	Outgroup	Outgroup	Nippancistroger	0
Phasmatodea	Outgroup	Outgroup	Orestes	0
Orthoptera	Outgroup	Outgroup	Phaeophilacris	0
Plecoptera	Outgroup	Outgroup	Protonemura	0
Phasmatodea	Outgroup	Outgroup	Timema	0
Orthoptera	Outgroup	Outgroup	Xya	0
Zoraptera	Outgroup	Outgroup	Zorotypus	0
